# Supplementary figures and images for: New-Onset Diabetes Mellitus, Hypertension, Dyslipidaemia as Sequelae of COVID-19 Infection—Systematic Review
Source: MDPI journal article supplement (doi:10.3390/ijerph192013280), 2022-10-14

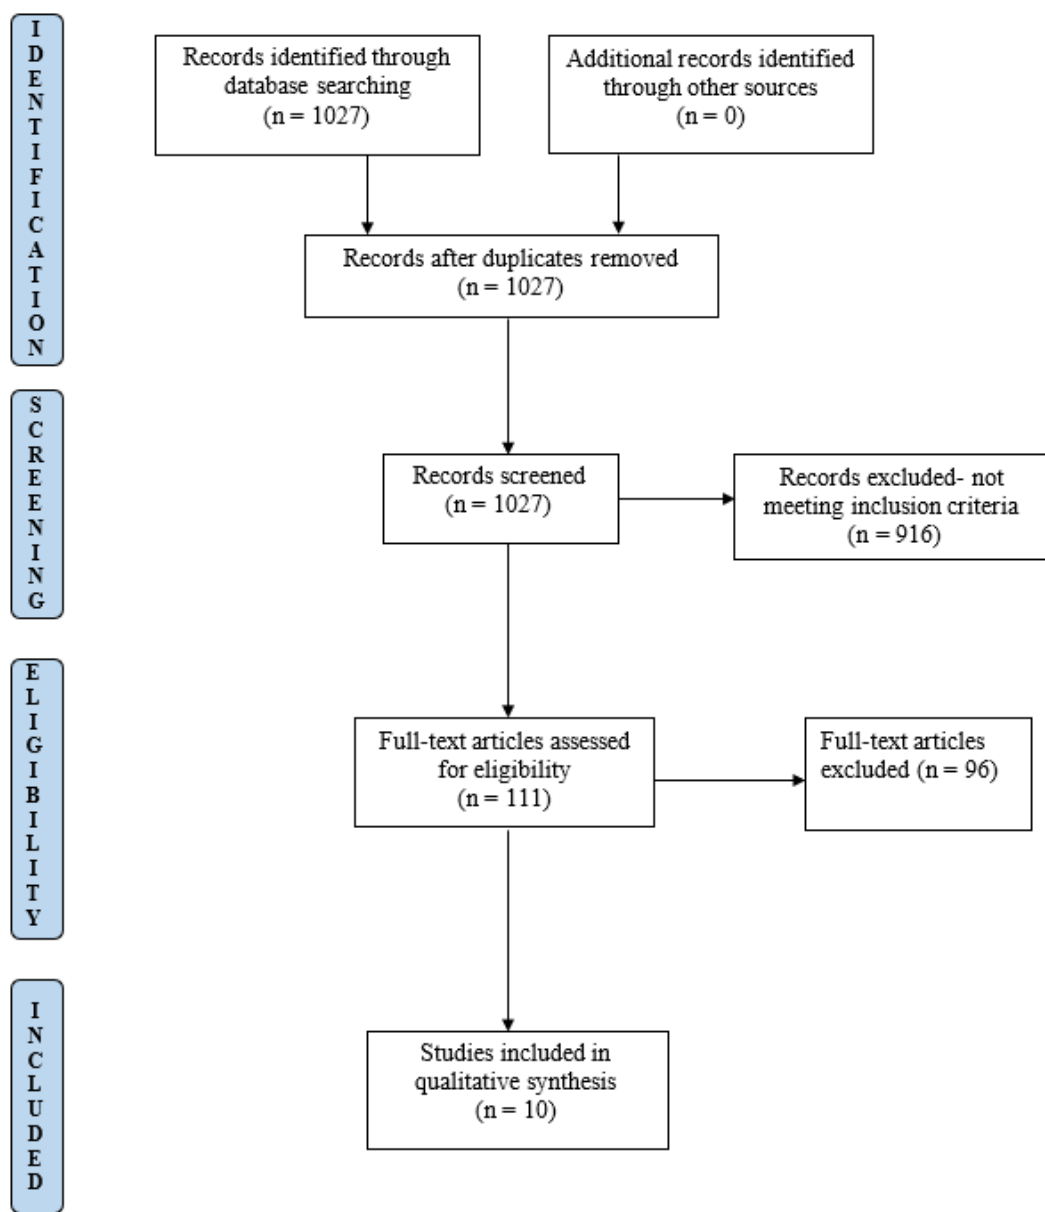

**Figure S1.** PRISMA flowchart- Flow diagram of the review.

Supplement: s1 [file s1]
